# Supplementary material for: What does the UK spend on health and social care?
Source: HighWire-hosted journal article supplement (doi:10.1136/bmj.l1619), 2019-04-09

# What does the UK spend on health and social care?

In 2016 public and private revenue spending on health and social care totalled nearly £203bn. This was more than one pound in 10 of the UK's GDP and equivalent to nearly £3100 per person. As a sector of the economy, health and social care rank second highest after the value of real estate activities

Capital, or investment, spending is accounted for separately by the OECD. For the UK, capital spending in 2016 amounted to £5.3bn

The UK spends about 34% of total spending on inpatient care: similar to France and Germany and more than Finland (26%). On the other hand, the UK spends a relatively high proportion on day (5%) and home based care (9%), compared with other countries

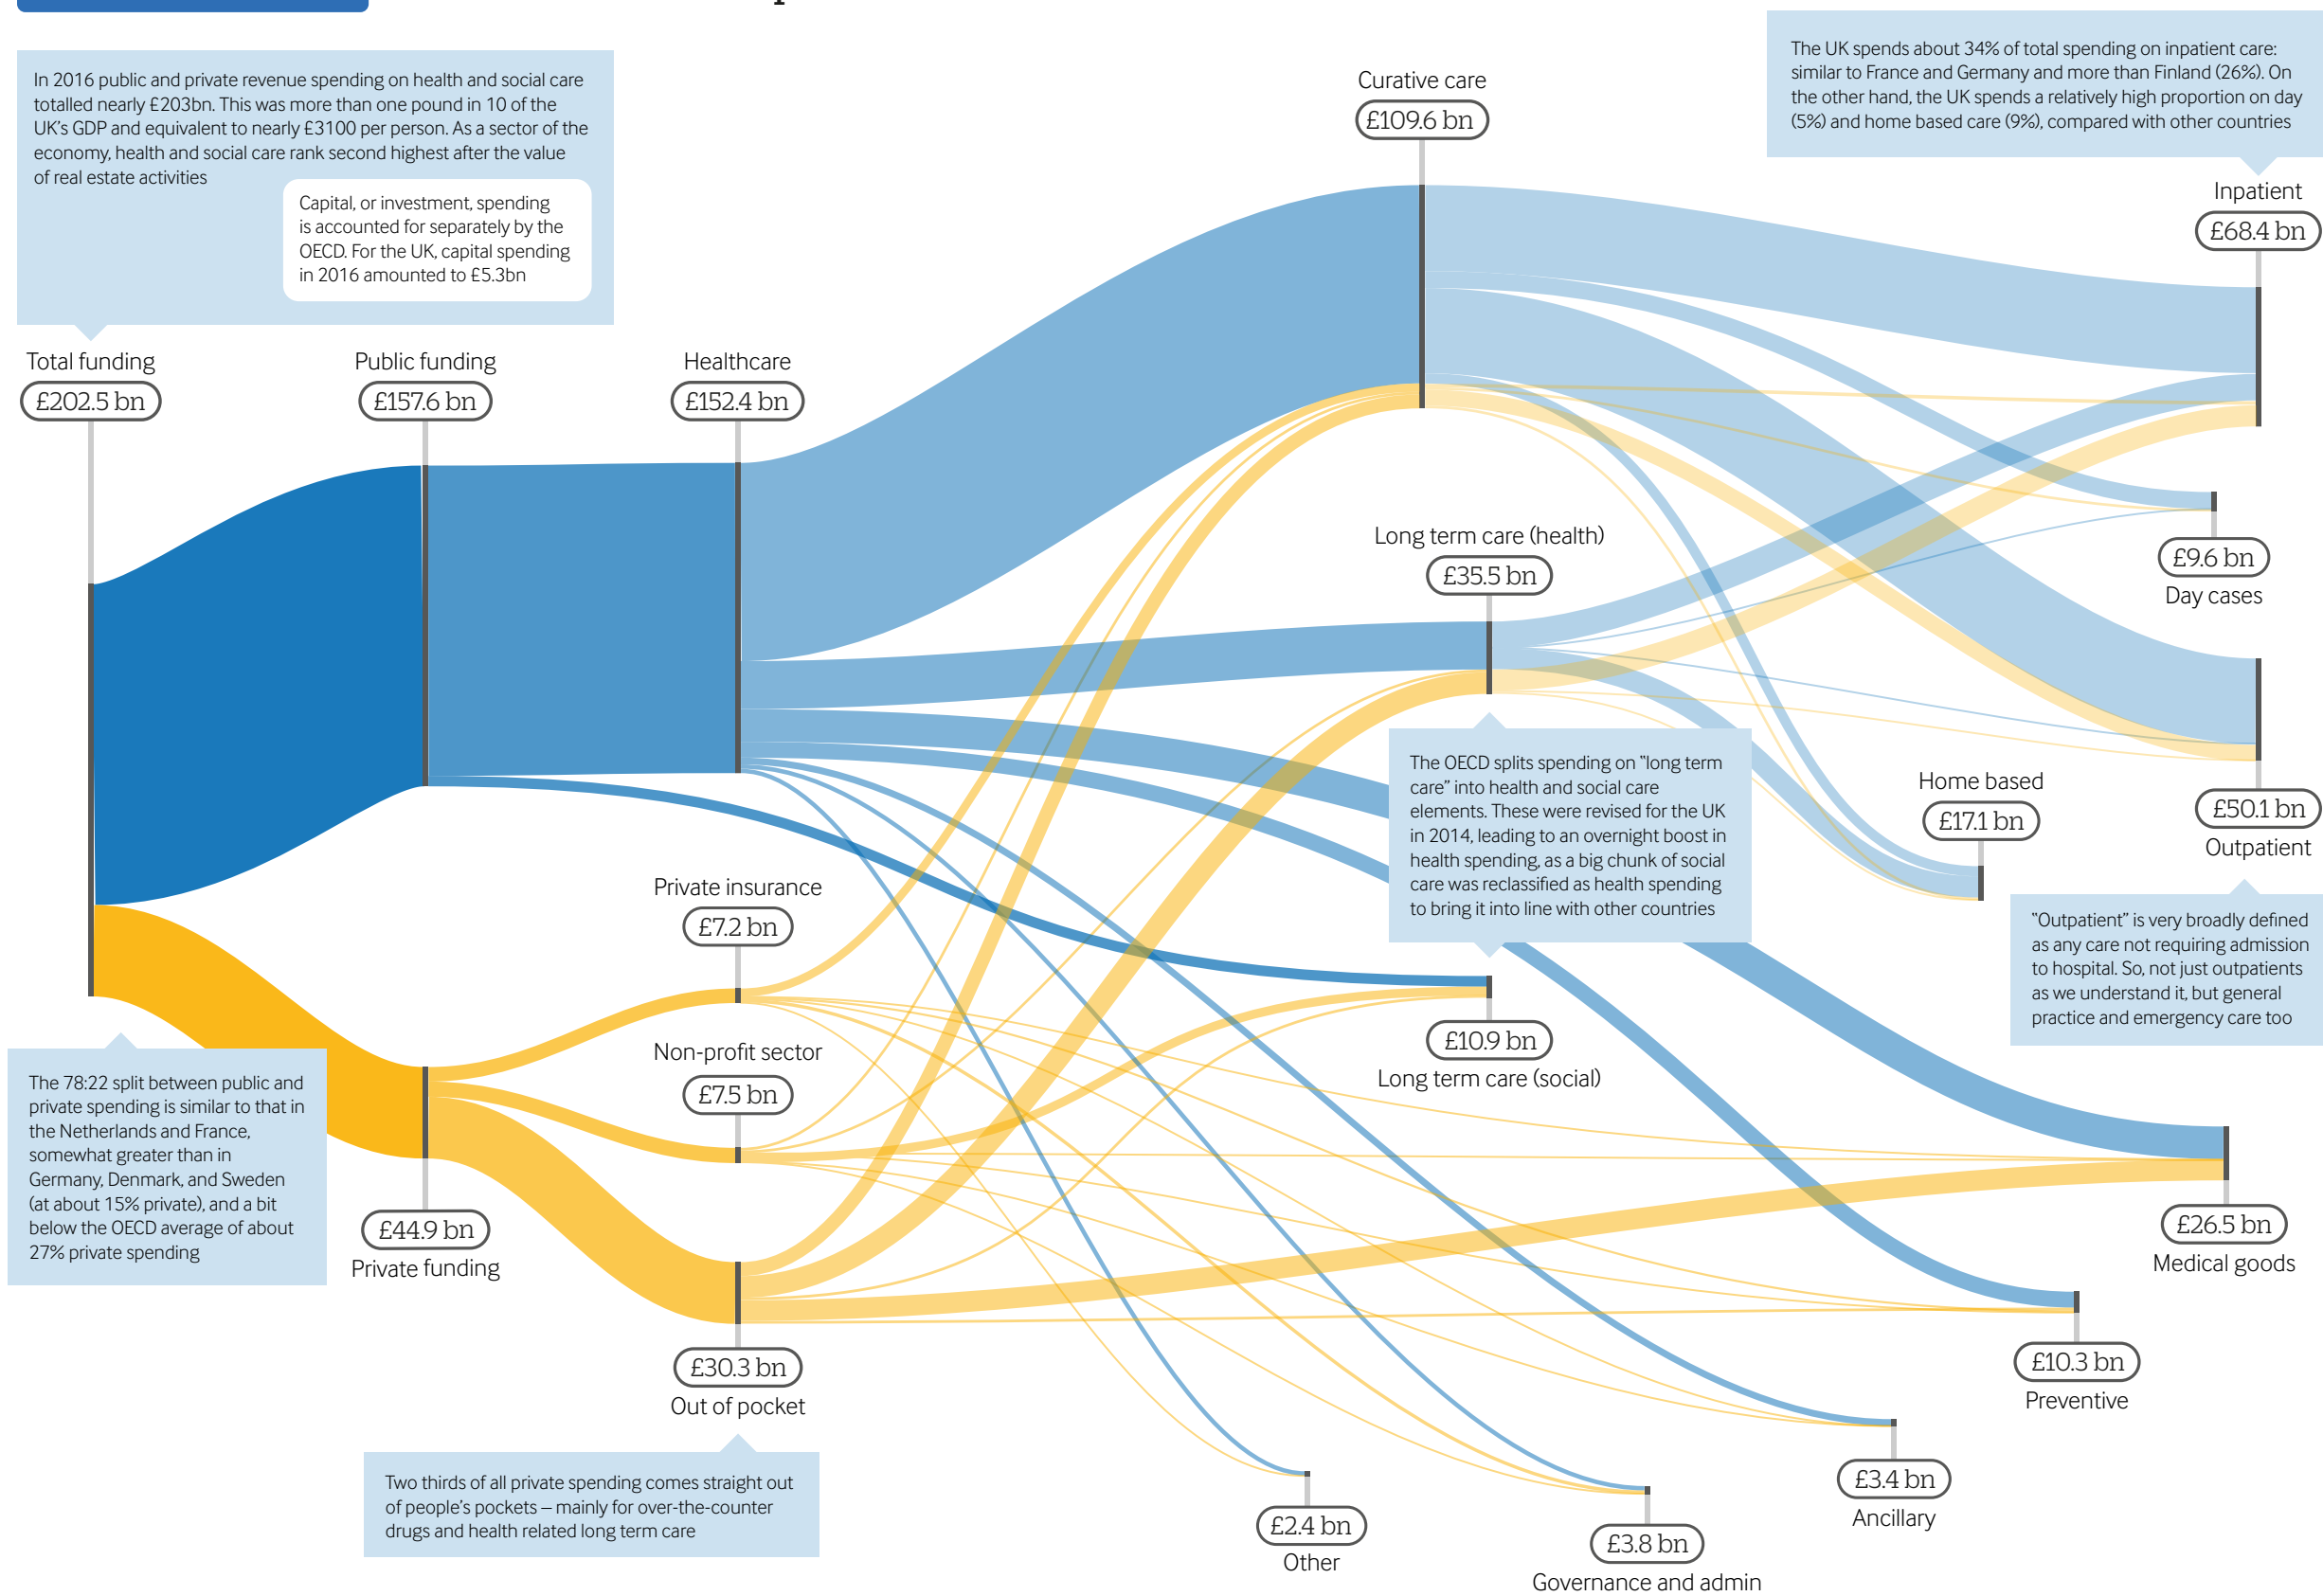

Supplement: public_and_private_spend_v16_web.pdf [file public_and_private_spend_v16_web.pdf]
